# Supplementary material for: Voltage-dependent gating of KCNH potassium channels lacking a covalent link between voltage-sensing and pore domains
Source: PubMed Central journal article supplement (PMC4389246; doi:10.1038/ncomms7672), 2015-03-30
Supplement: ncomms7672-s1.pdf [file ncomms7672-s1.pdf]

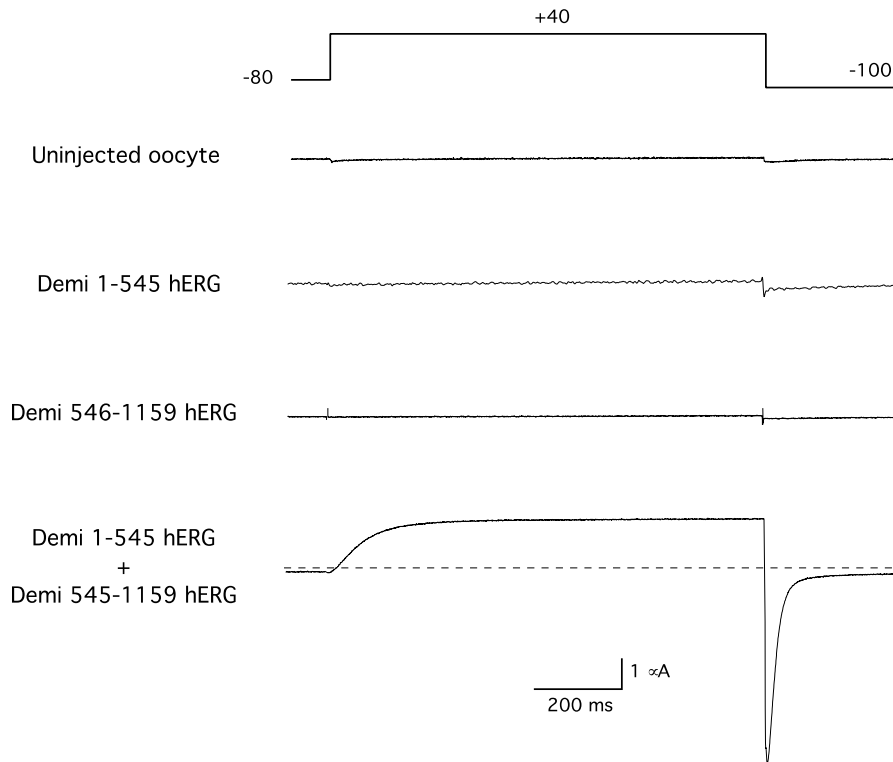

**Supplementary Figure 1. Absence of functional expression upon injection of separate N- and C-terminal HERG demi-channels.** Representative currents obtained in 50 mM extracellular  $K^+$  with the protocol shown at the top from uninjected oocytes (*top*) and from cells injected with cRNA encoding the N- (*Demi 1-145 hERG*) and C-terminal (*Demi 546-1159 hERG*) halves of HERG. A current trace from an oocyte expressing Y545 Split HERG is shown for comparison at the *bottom*.

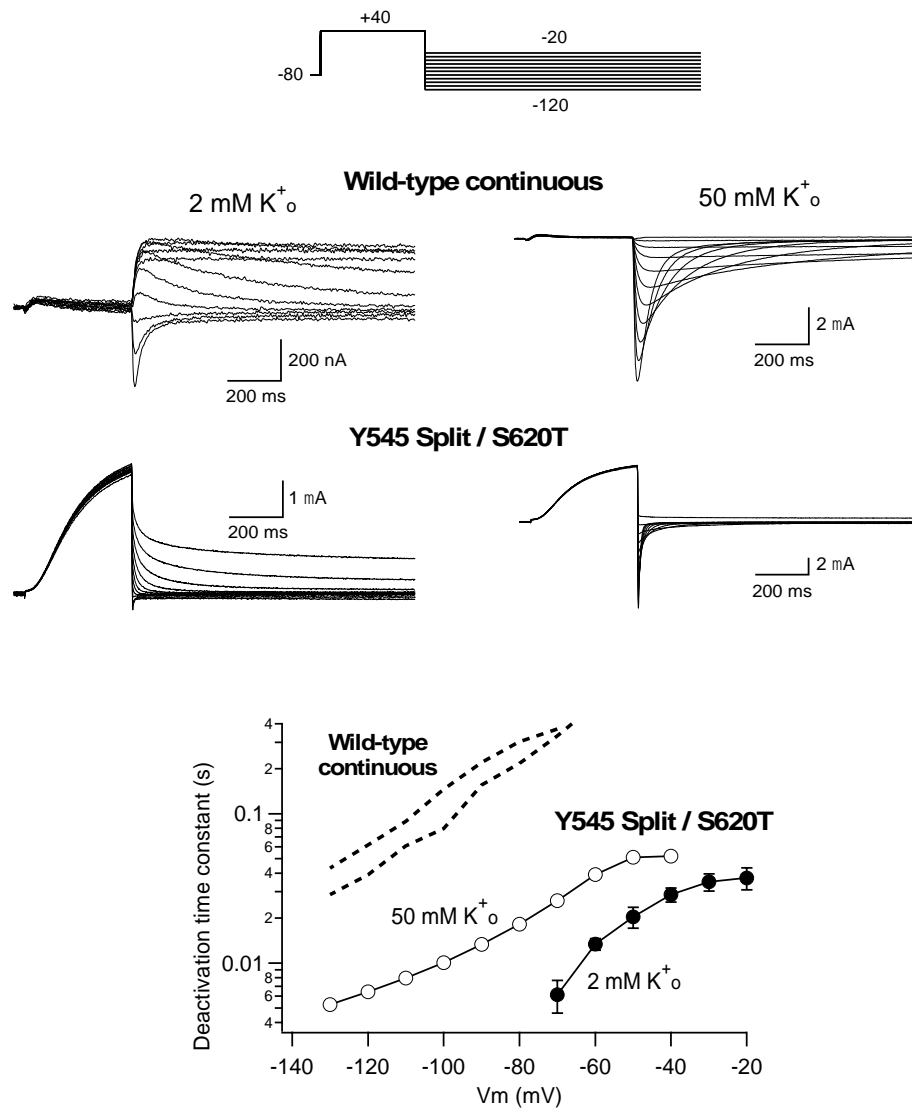

**Supplementary Figure 2. Comparison of deactivation properties in wild-type continuous and and Y545 Split HERG channels carrying a S620T point mutation in the pore module that minimizes inactivation.** Representative families of current traces obtained with the protocol shown are illustrated at the *top*. Extracellular solutions containing 2 (*left*) and 50 mM (*right*) K<sup>+</sup> were used as indicated. Plots of fast deactivation time constant values at different repolarisation voltages for splits in 2 (*closed circles*, n=4) and 50 mM external K<sup>+</sup> (*open circles*, n=4), and for wild-type non-split channels (*black and grey dashed lines*, respectively), are shown at the *bottom*.

Figure 2a: 1. Marker; 2. Continuous (total). 3 Continuous (biotinylated,30μL) 4. Split channel, biotinylated. 5. C Terminus, biotinylated. 6. Control; 7 Marker. The Figure shows only the lanes corresponding to pulled-down, biotinylated samples.

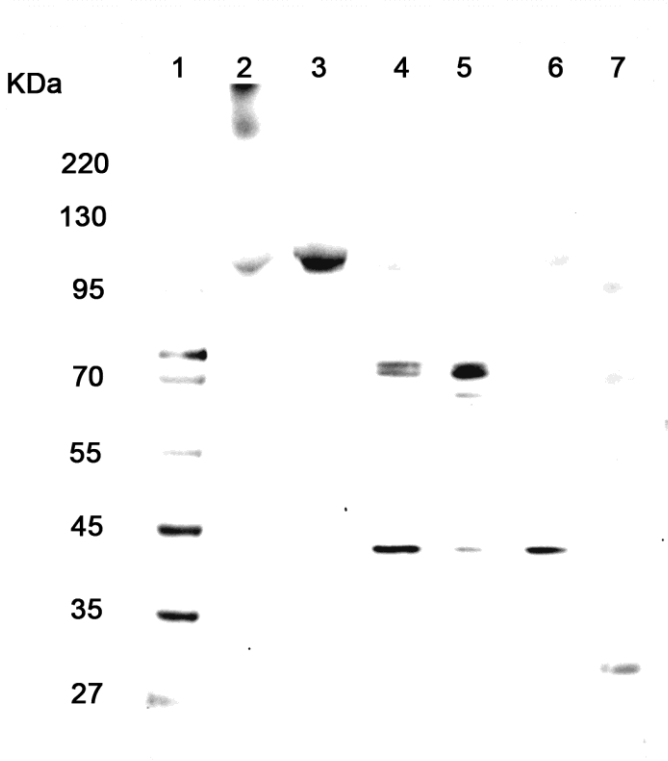

Figure 2b

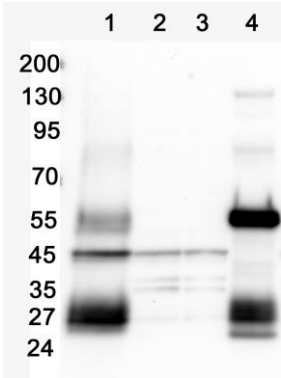

Figure 2c

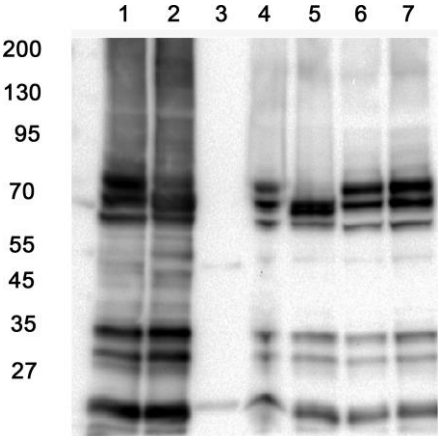

In the Figure, lanes 5-7 (eluates from IP, unbound protein) were omitted for clarity.

Figure 2d

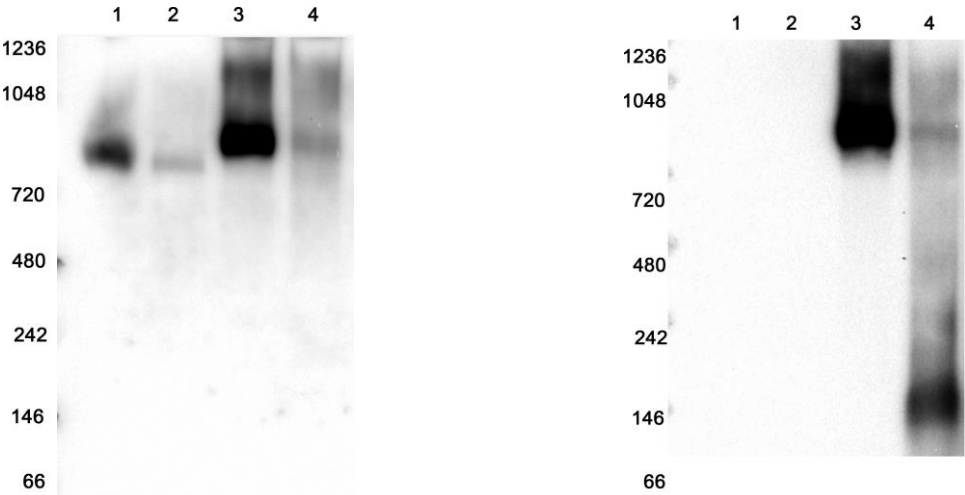

In the Figure, lane 1 (continuous  $K_v10.1$ , 100 ng injection) was omitted for clarity.

**Supplementary Figure 3. Images of uncropped blots**

**Supplementary Table I. Sequences of oligonucleotides**

| <b>Channel</b>      | <b>Purpose</b>                                                     | <b>Sequence (5'-3')</b>                                                     |
|---------------------|--------------------------------------------------------------------|-----------------------------------------------------------------------------|
| K <sub>V</sub> 10.1 | Insertion of stop codon, <i>KpnI</i> site and start codon          | ccactacattgaatattgaggtaccatgggagctgctgtgctgggcc                             |
| K <sub>V</sub> 10.1 | Insertion of Stop codon, <i>EagI</i> site and start codon          | ccactacattgaatattgacggccgatgggagctgctgtgctgggcc                             |
| K <sub>V</sub> 10.1 | Insertion of stop codon, <i>BamHI</i> site and start codon         | ccactacattgaatattgaggatccatgggagctgctgtgctgggcc                             |
| K <sub>V</sub> 10.1 | Deletion of residues from L341 of N-terminal demichannel           | cgagtgccccgaagctgtgagaggtctatttaaaa                                         |
| K <sub>V</sub> 10.1 | Deletion of residues up to A350 of C-terminal demichannel          | tggcggccgatggctgtgctgggc                                                    |
| K <sub>V</sub> 10.1 | 5MycTagging, 1st template and overlapping PCR, forward             | ggacccccgagctgctgggaggaaagctatggagcaaaagctc                                 |
| K <sub>V</sub> 10.1 | 5MycTagging, 1st and 2nd template PCR, reverse                     | cggccggaattccgggcccggacccccgagctgctgggagg                                   |
| K <sub>V</sub> 10.1 | 5MycTagging, 2nd template PCR, forward                             | cctgccccagccatggctatgtcgcccaagctctccatttc                                   |
| K <sub>V</sub> 10.1 | 5MycTagging, 3rd template PCR, forward                             | gaaatggagagcttgggcgacatgaccatggctggggcagg                                   |
| K <sub>V</sub> 10.1 | 5MycTagging, 3rd template and overlapping PCR, reverse             | gaatcatcctcaattggctgttgaaagct                                               |
| K <sub>V</sub> 10.1 | HA tagging, 1st HA forward                                         | caactagtgtacagatcaagcgggatgccctgc                                           |
| K <sub>V</sub> 10.1 | HA tagging, 1st HA reverse                                         | cgcataatctgggacgtcataaaggtagctggctccaaaaatgtctct                            |
| K <sub>V</sub> 10.1 | HA tagging, 2nd HA forward                                         | caactagtgtacagatcaagcgggatgccctgc                                           |
| K <sub>V</sub> 10.1 | HA tagging, 2nd HA forward                                         | atggatcccttagattacgcataatccggaacgtcataagggtatcccg<br>cataatctgggacgtcataagg |
| K <sub>V</sub> 10.1 | Synthetic HA tags 3 and 4, sense                                   | ccggtacgtcataaagggtatcccgcataatctggaacgtcataagggtat<br>ccgcataat            |
| K <sub>V</sub> 10.1 | Synthetic HA tags 3 and 4, antisense                               | ccggattatcgggatacccttatgacgttccagattatcgggataccct<br>tatgacgta              |
| K <sub>V</sub> 10.1 | Subcloning 4HA into pSGEM, fragment 1 and overlapping PCR, forward | aaggaggacatcaaggccttaaacgcaaaa                                              |
| K <sub>V</sub> 10.1 | Subcloning 4HA into pSGEM, fragment 1reverse                       | ttttaaataagacctctcacgcataatccgg                                             |
| K <sub>V</sub> 10.1 | Subcloning 4HA into pSGEM, fragment 2, forward                     | ccggattatcggtgagaggtctatttaaaa                                              |
| K <sub>V</sub> 10.1 | Subcloning 4HA into pSGEM, fragment 2 and overlapping PCR, reverse | ccctcgaggtcgacggtatcgataagctg                                               |
| K <sub>V</sub> 10.1 | Mutant G440S                                                       | caccagtgtggctttcgaacatcgccccatc                                             |
| K <sub>V</sub> 10.2 | Insertion of stop codon, <i>EagI</i> site and start codon          | ccattacctagaatattgacggccgatgggagcagcagctcctctgctcc                          |
| K <sub>V</sub> 10.2 | Insertion of stop codon, <i>HindIII</i> site and start codon       | ccattacctagaatattgaaagcttatgggagcagcagctcctctgctcc                          |
| K <sub>V</sub> 10.1 | Mutant R336Q                                                       | tccgtcttgggcaagtggcgcaagctggaccac                                           |
| K <sub>V</sub> 11.1 | Mutant G628S                                                       | ccagtgtgggcttcagcaacgtctctccc                                               |
| K <sub>V</sub> 11.1 | Synthesis N-terminal demi-channel, forward                         | ggaagcttcaggatgccggtcggaggggcccacgtc                                        |
| K <sub>V</sub> 11.1 | Synthesis N-terminal demi-channel, reverse                         | ggggatcctagtactctgagtagcgatccagcttccgc                                      |
| K <sub>V</sub> 11.1 | Synthesis C-terminal demi-channel, forward                         | ggaagcttcaggatgggcgggccggtctgttctgtcatgtgcacc                               |
| K <sub>V</sub> 11.1 | Synthesis C-terminal demi-channel, reverse                         | ggggatcctaactgcccgggtccgagccgtgtctgtgcagggg                                 |
